# Supplementary material for: Visceral Adiposity Index (VAI) in Children and Adolescents with Obesity: No Association with Daily Energy Intake but Promising Tool to Identify Metabolic Syndrome (MetS)
Source: PubMed Central journal article supplement (PMC7911630; doi:10.3390/nu13020413), 2021-01-28
Supplement: nutrients-13-00413-s001.pdf [file nutrients-13-00413-s001.pdf]

**Supplementary Table S1.** Characteristics of the subpopulations according to gender and age.

|                     | Boys aged <10 years<br>(n=57) | Boys aged ≥10 years<br>(n=256) | Girls aged <10 years<br>(n=72) | Girls aged ≥10 years<br>(n=252) |
|---------------------|-------------------------------|--------------------------------|--------------------------------|---------------------------------|
| <b>Age</b>          | 9 (8 - 9)                     | 12 (11 - 13)                   | 9 (8 - 9)                      | 12 (11 - 14)                    |
| <b>Height</b>       | 1.39 (1.35 - 1.44)            | 1.58 (1.5 - 1.67)              | 1.41 (1.35 - 1.45)             | 1.57 (1.5 - 1.62)               |
| <b>Weight</b>       | 48 (43.5 - 53)                | 73.5 (61.7 - 90)               | 50.1 (45.2 - 55.7)             | 77 (65.4 - 86.5)                |
| <b>BMI</b>          | 25.2 (23.9 - 27)              | 29.3 (27.2 - 31.8)             | 25.3 (24.1 - 27)               | 31.1 (28.6 - 33.3)              |
| <b>BMI z-score</b>  | 3.1 (2.9 - 3.6)               | 2.9 (2.6 - 3.1)                | 2.7 (2.6 - 3.1)                | 2.8 (2.6 - 3)                   |
| <b>WC</b>           | 82 (79 - 86)                  | 97 (91 - 104)                  | 82 (78 - 87)                   | 96 (89 - 103)                   |
| <b>WHR</b>          | 0.59 (0.57 - 0.65)            | 0.62 (0.59 - 0.65)             | 0.59 (0.56 - 0.63)             | 0.62 (0.58 - 0.66)              |
| <b>ABSI</b>         | 0.0821 (0.0784 - 0.084)       | 0.0813 (0.0783 - 0.0837)       | 0.0797 (0.0777 - 0.0838)       | 0.078 (0.0741 - 0.0816)         |
| <b>Glucose</b>      | 84 (80 - 89)                  | 86 (81 - 90)                   | 82 (78 - 87)                   | 85 (80 - 91)                    |
| <b>HOMA-IR</b>      | 2.09 (1.43 - 3.5)             | 3.31 (2.3 - 4.69)              | 2.47 (1.87 - 3.88)             | 3.66 (2.59 - 5.14)              |
| <b>HOMA β</b>       | 178.6 (120.7 - 247.8)         | 256.7 (174.3 - 370.4)          | 239.6 (169.1 - 341)            | 276.5 (196.3 - 435.3)           |
| <b>QUICK</b>        | 0.34 (0.32 - 0.36)            | 0.32 (0.31 - 0.34)             | 0.33 (0.31 - 0.35)             | 0.32 (0.3 - 0.33)               |
| <b>TyG index</b>    | 4.37 (4.15 - 4.51)            | 4.44 (4.27 - 4.6)              | 4.41 (4.25 - 4.63)             | 4.4 (4.25 - 4.57)               |
| <b>TG</b>           | 71 (48 - 99)                  | 84 (59 - 117)                  | 81 (61 - 126)                  | 79 (58 - 107)                   |
| <b>TC</b>           | 154 (142 - 178)               | 157 (142 - 180)                | 155 (142 - 177)                | 154 (136 - 175)                 |
| <b>HDL-C</b>        | 52 (46 - 57)                  | 45 (39 - 53)                   | 46 (41 - 54)                   | 47 (40 - 54)                    |
| <b>LDL-C</b>        | 92 (77 - 108)                 | 96 (78 - 114)                  | 94 (83 - 111)                  | 91 (77 - 110)                   |
| <b>TG/HDL ratio</b> | 1.48 (0.95 - 2.06)            | 1.81 (1.16 - 2.71)             | 1.72 (1.25 - 3.1)              | 1.69 (1.19 - 2.35)              |
| <b>VAI</b>          | 0.77 (0.48 - 1.09)            | 1.05 (0.66 - 1.61)             | 1.36 (0.93 - 2.2)              | 1.37 (0.95 - 1.96)              |
| <b>SBP</b>          | 105 (100 - 110)               | 115 (110 - 120)                | 105 (99 - 113)                 | 114 (109 - 120)                 |
| <b>DBP</b>          | 60 (58 - 70)                  | 70 (60 - 77)                   | 60 (57 - 70)                   | 70 (63 - 75)                    |
| <b>MetS</b>         | 18 (31.6%)                    | 21 (8.2%)                      | 26 (36.1%)                     | 14 (5.6%)                       |

Body Mass Index z-score (BMI z-score), Waist Circumference (WC), Waist-to-Height Ratio (WHR), A Body Shape Index (ABSI), Homeostatic Model Assessment Index – Insulin Resistance (HOMA-IR), Homeostatic Model Assessment Index -β (HOMA-β), Quantitative Insulin sensitivity Check Index (QUICKI), Triglyceride Glucose Index (TyG index), Triglycerides (TG), Total cholesterol (TC), High-Density Lipoprotein cholesterol (HDL-C), Low-Density Lipoprotein cholesterol (LDL-C), Triglycerides-to-HDL ratio (TG/HDL ratio), Visceral Adiposity Index (VAI), Systolic blood pressure (SBP), Diastolic blood pressure (DBP), Metabolic Syndrome (MetS).

**Supplementary Table S2.** Heatmap of correlations of VAI with adiposity indices, glyco-metabolic indices, lipids, TG/HDL-C ratio and blood pressure in the subpopulations according to gender and age.

|              |   | VAI          |        |                |                |        |                 |                 |       |
|--------------|---|--------------|--------|----------------|----------------|--------|-----------------|-----------------|-------|
|              |   | Whole cohort | Boys   | Boys <10 years | Boys ≥10 years | Girls  | Girls <10 years | Girls ≥10 years |       |
| BMI          | q | 0.21         | 0.32   | 0.14           | 0.26           | 0.07   | -0.05           | 0.09            |       |
|              | P | <0.001       | <0.001 | 0.311          | <0.001         | 0.237  | 0.654           | 0.145           |       |
| BMI z-score  | q | -0.02        | 0.01   | 0.16           | 0.07           | 0.06   | -0.13           | 0.12            |       |
|              | P | 0.716        | 0.798  | 0.246          | 0.277          | 0.285  | 0.270           | 0.052           |       |
| WC           | q | 0.26         | 0.37   | 0.27           | 0.32           | 0.22   | 0.14            | 0.28            |       |
|              | P | <0.001       | <0.001 | 0.039          | <0.001         | <0.001 | 0.246           | <0.001          |       |
| WHR          | q | 0.23         | 0.21   | 0.30           | 0.18           | 0.28   | 0.18            | 0.32            | q     |
|              | P | <0.001       | <0.001 | 0.026          | 0.004          | <0.001 | 0.137           | <0.001          | -1.00 |
| ABSI         | q | 0.10         | 0.08   | 0.23           | 0.05           | 0.28   | 0.28            | 0.30            | -0.75 |
|              | P | 0.015        | 0.182  | 0.088          | 0.383          | <0.001 | 0.020           | <0.001          | -0.50 |
| Glycemia     | q | -0.06        | 0.03   | 0.02           | 0.00           | -0.12  | -0.06           | -0.13           | -0.25 |
|              | P | 0.116        | 0.634  | 0.857          | 0.972          | 0.039  | 0.631           | 0.044           | 0.00  |
| HOMA - IR    | q | 0.38         | 0.47   | 0.35           | 0.44           | 0.28   | 0.36            | 0.29            | 0.25  |
|              | P | <0.001       | <0.001 | 0.008          | <0.001         | <0.001 | 0.003           | <0.001          | 0.50  |
| HOMA -β      | q | 0.46         | 0.47   | 0.40           | 0.44           | 0.42   | 0.46            | 0.41            | 0.75  |
|              | P | <0.001       | <0.001 | 0.002          | <0.001         | <0.001 | <0.001          | <0.001          | 1.00  |
| QUICKI       | q | -0.38        | -0.46  | -0.36          | -0.44          | -0.29  | -0.36           | -0.29           |       |
|              | P | <0.001       | <0.001 | 0.007          | <0.001         | <0.001 | 0.003           | <0.001          |       |
| TyG index    | q | 0.86         | 0.92   | 0.92           | 0.92           | 0.88   | 0.87            | 0.88            |       |
|              | P | <0.001       | <0.001 | <0.001         | <0.001         | <0.001 | <0.001          | <0.001          |       |
| TG           | q | 0.88         | 0.93   | 0.94           | 0.93           | 0.91   | 0.91            | 0.91            |       |
|              | P | <0.001       | <0.001 | <0.001         | <0.001         | <0.001 | <0.001          | <0.001          |       |
| TC           | q | 0.21         | 0.23   | 0.32           | 0.23           | 0.26   | 0.09            | 0.31            |       |
|              | P | <0.001       | <0.001 | 0.017          | <0.001         | <0.001 | 0.467           | <0.001          |       |
| HDL-C        | q | -0.63        | -0.70  | -0.65          | -0.67          | -0.61  | -0.74           | -0.56           |       |
|              | P | <0.001       | <0.001 | <0.001         | <0.001         | <0.001 | <0.001          | <0.001          |       |
| LDL-C        | q | 0.28         | 0.28   | 0.41           | 0.25           | 0.35   | 0.27            | 0.37            |       |
|              | P | <0.001       | <0.001 | 0.001          | <0.001         | <0.001 | 0.022           | <0.001          |       |
| TG/HDL ratio | q | 0.95         | 0.99   | 0.99           | 0.99           | 0.99   | 0.99            | 0.99            |       |
|              | P | <0.001       | <0.001 | <0.001         | <0.001         | <0.001 | <0.001          | <0.001          |       |
| SBP          | q | 0.11         | 0.20   | 0.25           | 0.13           | 0.05   | 0.26            | 0.00            |       |
|              | P | 0.009        | 0.001  | 0.066          | 0.045          | 0.369  | 0.040           | 0.941           |       |
| DBP          | q | 0.03         | 0.03   | -0.09          | -0.01          | 0.03   | 0.06            | 0.02            |       |
|              | P | 0.456        | 0.566  | 0.526          | 0.902          | 0.629  | 0.657           | 0.766           |       |

Body Mass Index z-score (BMI z-score), Waist Circumference (WC), Waist-to-Height Ratio (WHR), A Body Shape Index (ABSI), Homeostatic Model Assessment Index – Insulin Resistance (HOMA-IR), Homeostatic Model Assessment Index - β (HOMA-β), Quantitative Insulin sensitivity Check Index (QUICKI), Triglyceride Glucose Index (TyG index), Triglycerides (TG), Total cholesterol (TC), High-Density Lipoprotein cholesterol (HDL-C), Low-Density Lipoprotein cholesterol (LDL-C), Triglycerides-to-HDL ratio (TG/HDL ratio), Visceral Adiposity Index (VAI), Systolic blood pressure (SBP), Diastolic blood pressure (DBP). Color coding according to Spearman correlation coefficient (q).
